# Supplementary material
Source: HighWire-hosted journal article supplement (https://injuryprevention.bmj.com/content/27/3/208)
Supplement: inline-supplementary-material-1 [file inline-supplementary-material-1.pdf]

**Figure S1 Data extraction tool****Date of data collection:** DD/MM/YYYY**Data enumerator code:****Data collection point:** Police station: (Specify name) \_\_\_\_\_ Health facility: (Specify name) \_\_\_\_\_

Level of facility:

1- National referral

2- Regional referral

3- District Hospitals

4- Health Center IV

5-Health Center III

6- Health Center II

 Mortuary: (Specify name) \_\_\_\_\_ Insurance Firm: (Specify) \_\_\_\_\_ Other (Specify) \_\_\_\_\_**District:** \_\_\_\_\_ (Drop down list)**Form 1: Crash-level**

|                                  |                                      |                                                                                                                                                                                           |
|----------------------------------|--------------------------------------|-------------------------------------------------------------------------------------------------------------------------------------------------------------------------------------------|
| <b>C1</b>                        | <b>Crash identifier:</b>             | <input type="text"/> <input type="text"/> <input type="text"/> - <input type="text"/> <input type="text"/> <input type="text"/> <input type="text"/><br><b>District Code - Crash Code</b> |
| <b>C2</b>                        | <b>Date of traffic crash</b>         | DD/MM/YYYY                                                                                                                                                                                |
| <b>C3</b>                        | <b>Day of week for traffic crash</b> |                                                                                                                                                                                           |
| <b>C4</b>                        | <b>Time of traffic crash (24hrs)</b> | HH : MM (24hr)                                                                                                                                                                            |
| <b>LOCATION OF TRAFFIC CRASH</b> |                                      |                                                                                                                                                                                           |
| <b>C5</b>                        | <b>District</b>                      |                                                                                                                                                                                           |
| <b>C6</b>                        | <b>Sub-county</b>                    |                                                                                                                                                                                           |
| <b>C7</b>                        | <b>Village (LC I)</b>                |                                                                                                                                                                                           |

|                            |                                                          |                                                                                                                                                                                                                                                                                                                                                                                   |
|----------------------------|----------------------------------------------------------|-----------------------------------------------------------------------------------------------------------------------------------------------------------------------------------------------------------------------------------------------------------------------------------------------------------------------------------------------------------------------------------|
| <b>C8</b>                  | <b>Proximity of crash to town (Township)</b>             | <ol style="list-style-type: none"> <li><b>Within Town</b></li> <li><b>Outside town</b></li> </ol>                                                                                                                                                                                                                                                                                 |
| <b>C9</b>                  | <b>Enter name of Town/Nearest Town</b>                   | _____                                                                                                                                                                                                                                                                                                                                                                             |
| <b>C10</b>                 | <b>Distance from nearest town</b>                        | _____ KM                                                                                                                                                                                                                                                                                                                                                                          |
| <b>C11</b>                 | <b>Name of road where the crash occurred</b>             | _____                                                                                                                                                                                                                                                                                                                                                                             |
| <b>C12</b>                 | <b>Type of road where crash occurred</b>                 | <ol style="list-style-type: none"> <li>Murrum road</li> <li>Tarmac road</li> <li>99. Unknown</li> </ol>                                                                                                                                                                                                                                                                           |
| <b>C13</b>                 | <b>Road surface</b>                                      | <ol style="list-style-type: none"> <li>Wet</li> <li>Dry</li> <li>99. Unknown</li> </ol>                                                                                                                                                                                                                                                                                           |
| <b>C14</b>                 | <b>Road condition</b>                                    | <ol style="list-style-type: none"> <li>In good (or normal) Repair</li> <li>In bad repair</li> <li>99. Unknown</li> </ol>                                                                                                                                                                                                                                                          |
| <b>C15</b>                 | <b>Class of roadway where the crash occurred</b>         | <ol style="list-style-type: none"> <li>Highway</li> <li>Urban road, two way</li> <li>Urban road, one way</li> <li>Road outside a built-up area</li> <li>Restricted road</li> <li>Other</li> <li>99. Unknown</li> </ol>                                                                                                                                                            |
| <b>C16</b>                 | <b>Spot where crash happened</b>                         | <ol style="list-style-type: none"> <li>Round about</li> <li>Road junction</li> <li>Walkway</li> <li>designated pedestrian crossing (e.g. Zebra crossing, bridge)</li> <li>Open road stretch</li> <li>Other</li> <li>99. Unknown</li> </ol>                                                                                                                                        |
| <b>C17</b>                 | <b>Crash type</b>                                        | <ol style="list-style-type: none"> <li>Crash with pedestrian</li> <li>Crash with a Motorcycle</li> <li>Crash with parked vehicle</li> <li>Crash with fixed obstacle e.g. tree, post, fence, etc.</li> <li>Crash with Non-fixed obstacle</li> <li>Crash with animal</li> <li>Single vehicle crash/non-collision</li> <li>Crash with two or more vehicles</li> <li>Other</li> </ol> |
| <b>C18</b>                 | <b>Number of vehicles involved (If 8 selected above)</b> | _____                                                                                                                                                                                                                                                                                                                                                                             |
| <b>VEHICLE INFORMATION</b> |                                                          |                                                                                                                                                                                                                                                                                                                                                                                   |
| <b>Vehicle_id</b>          | <b>Vehicle number</b>                                    | ___ (Numeric)                                                                                                                                                                                                                                                                                                                                                                     |
| <b>C19</b>                 | <b>What type of Vehicle was this?</b>                    | <ol style="list-style-type: none"> <li>Motor cars</li> <li>Motorcycle</li> <li>Pedal cycle (e.g Bicycle)</li> <li>Dual Purpose vehicle (e.g Double cabins)</li> <li>Light omnibus (e.g Taxi)</li> <li>Medium Omnibus (e.g Coaster)</li> <li>Heavy Omnibus (e.g Bus)</li> </ol>                                                                                                    |

|                                                       |                                                              |                                                                                                                                                                                                                                                                                                  |
|-------------------------------------------------------|--------------------------------------------------------------|--------------------------------------------------------------------------------------------------------------------------------------------------------------------------------------------------------------------------------------------------------------------------------------------------|
|                                                       |                                                              | 8. Light goods vehicle (e.g. Pick up)<br>9. Medium goods (e.g. Canter, Dyna, etc.)<br>10. Heavy goods vehicle (e.g. Lorries)<br>11. Tankers and Trailers<br>12. Engineering plant (e.g. Earth movers)<br>13. Tractors<br>14. Other<br>99. Unknown                                                |
| <b>C20</b>                                            | <b>What was the vehicle doing before the crash occurred?</b> | 1. Reversing<br>2. Parked<br>3. Entering or leaving a parking position<br>4. Slowing or stopping<br>5. Taking off<br>6. Waiting to turn<br>7. Turning<br>8. Changing lane<br>9. Avoidance manoeuvre<br>10. Overtaking vehicle<br>11. Straight forward normal driving<br>12. Other<br>99. Unknown |
| <b>C21</b>                                            | <b>Severity of crash</b>                                     | 1. Fatal (at least one death)<br>2. Serious (at least one person needed hospital care)<br>3. Minor (property damage, not injuries requiring hospital)<br>99. Unknown                                                                                                                             |
| <b>C22</b>                                            | <b>How many people were injured?</b>                         | _____                                                                                                                                                                                                                                                                                            |
| <b>C23</b>                                            | <b>How many people died at the crash site?</b>               | _____                                                                                                                                                                                                                                                                                            |
| <b>C24</b>                                            | <b>Health facility where victims were taken</b>              | 1. Govt Hospital<br>2. Health center<br>3. Private Hospital / Clinic<br>4. Other<br>99. Unknown                                                                                                                                                                                                  |
| <b>C25</b>                                            | <b>Name of health facility to which victims were taken</b>   | _____                                                                                                                                                                                                                                                                                            |
| <b>C26</b>                                            | <b>District in which the health facility is found.</b>       | _____ (Drop down list)                                                                                                                                                                                                                                                                           |
| <b>FACTORS ASSOCIATED WITH THE ROAD TRAFFIC CRASH</b> |                                                              |                                                                                                                                                                                                                                                                                                  |
| <b>F1</b>                                             | <b>Weather conditions</b>                                    | 1. Cloudy/mist<br>2. Clear<br>3. Light rain<br>4. Heavy rain<br>5. Flooding<br>6. Strong wind<br>7. Other weather condition<br>99. Unknown weather condition                                                                                                                                     |
| <b>F2</b>                                             | <b>Lighting conditions</b>                                   | 1. Daylight<br>2. Darkness-no street lights                                                                                                                                                                                                                                                      |

|  |  |                                                                                                                                                                                   |
|--|--|-----------------------------------------------------------------------------------------------------------------------------------------------------------------------------------|
|  |  | <ol style="list-style-type: none"><li>3. Darkness-with street lights on</li><li>4. Darkness-with poor street light</li><li>5. Twilight (Dusk /Dawn)</li><li>99. Unknown</li></ol> |
|--|--|-----------------------------------------------------------------------------------------------------------------------------------------------------------------------------------|

**Date of data collection:**        D D / M M / Y Y Y Y

**Data enumerator code:**

 

Police station: (Specify name) \_\_\_\_\_

Health facility: (Specify name) \_\_\_\_\_

Level of facility:

1- National referral

2- Regional referral

3- District Hospitals

4- Health Center IV

5-Health Center III

6- Health Center II

Mortuary: (Specify name) \_\_\_\_\_

Insurance Firm: (Specify) \_\_\_\_\_

Other (Specify) \_\_\_\_\_

**District:** \_\_\_\_\_ (Drop down list)

**Form 2: Individual level**

|           |                                              |                                                                                                                                                                                                                                                                                                         |
|-----------|----------------------------------------------|---------------------------------------------------------------------------------------------------------------------------------------------------------------------------------------------------------------------------------------------------------------------------------------------------------|
| <b>P1</b> | <b>Unique identifier</b>                     | Crash identifier /Individual number _____                                                                                                                                                                                                                                                               |
| <b>P2</b> | <b>Date of traffic crash</b>                 | D D / M M / Y Y Y Y                                                                                                                                                                                                                                                                                     |
| <b>P3</b> | <b>Age in completed years of the injured</b> | _____ [numeric] ( Enter 999 if unknown)                                                                                                                                                                                                                                                                 |
| <b>P4</b> | <b>Sex of the injured</b>                    | 1. Male<br>2. Female<br>99. Unknown                                                                                                                                                                                                                                                                     |
| <b>P5</b> | <b>Type of road user injured</b>             | 1. Pedestrian<br>2. Driver<br>3. Motorcyclist<br>4. Pedal cyclist<br>5. Passenger on motorcycle<br>6. Passenger in a private car<br>7. Passenger in commercial minibus or equivalent<br>8. Passenger in a bus<br>9. Passenger in heavy vehicle<br>10. Passenger on pick-up truck<br>11. Other (specify) |

|            |                                                                                                      |                                                                                                                                                                                                                                                                                         |
|------------|------------------------------------------------------------------------------------------------------|-----------------------------------------------------------------------------------------------------------------------------------------------------------------------------------------------------------------------------------------------------------------------------------------|
|            |                                                                                                      | 99. Unknown                                                                                                                                                                                                                                                                             |
| <b>P6</b>  | <b>If pedestrian, type of activity before crash occurred</b>                                         | <ol style="list-style-type: none"> <li>1. Crossing road</li> <li>2. Walking/ Standing/ Running on the road</li> <li>3. Walking/ Standing/ Running by the road side</li> <li>4. Vending</li> <li>5. Playing on the road side</li> <li>6. Other (Specify)</li> <li>99. Unknown</li> </ol> |
| <b>P7</b>  | <b>If Driver/motorcyclist, did they possess a driving permit</b>                                     | <ol style="list-style-type: none"> <li>1. Yes, Full License not expired</li> <li>2. Yes, Learners Permit</li> <li>3. Yes, Expired License</li> <li>4. No</li> <li>99. Unknown</li> </ol>                                                                                                |
| <b>P8</b>  | <b>If driver, motorcyclist, which of these factors was suspected of them? (Check all that apply)</b> | <ol style="list-style-type: none"> <li>1. Substance Use</li> <li>2. Alcohol use</li> <li>3. Fatigue</li> <li>4. Long hours driving</li> <li>5. Cellphone use</li> <li>6. None</li> <li>7. Other</li> </ol>                                                                              |
| <b>P9</b>  | <b>Tested for alcohol</b>                                                                            | <ol style="list-style-type: none"> <li>1. Yes</li> <li>2. No</li> <li>99. Unknown</li> </ol>                                                                                                                                                                                            |
| <b>P10</b> | <b>Tested for other substance use</b>                                                                | <ol style="list-style-type: none"> <li>1. Yes</li> <li>2. No</li> <li>99. Unknown</li> </ol>                                                                                                                                                                                            |
| <b>P11</b> | <b>Personal protection measures used</b>                                                             | <ol style="list-style-type: none"> <li>1. Helmet</li> <li>2. Seat belt</li> <li>3. Reflector material</li> <li>4. None</li> <li>5. Not Applicable (No restraint could be used for type of vehicle e.g. tractor)</li> <li>6. Others</li> <li>99. Unknown</li> </ol>                      |
|            |                                                                                                      |                                                                                                                                                                                                                                                                                         |
| <b>P12</b> | <b>Taken to health care facility</b>                                                                 | <ol style="list-style-type: none"> <li>1. Yes</li> <li>2. No</li> <li>99. Unknown</li> </ol>                                                                                                                                                                                            |
| <b>P13</b> | <b>Hospital / health facility where taken</b>                                                        | <p style="text-align: right;">_____ [name of hospital]</p> <p>(Enter unknown if applicable)</p>                                                                                                                                                                                         |
| <b>P14</b> | <b>Pre-hospital care given</b>                                                                       | <ol style="list-style-type: none"> <li>1. First aid by Police</li> <li>2. First aid by other agency</li> <li>3. First aid by lay by-stander</li> <li>4. None</li> <li>99. Unknown</li> </ol>                                                                                            |
| <b>P15</b> | <b>Transport to hospital</b>                                                                         | <ol style="list-style-type: none"> <li>1. Ambulance – Police</li> </ol>                                                                                                                                                                                                                 |

|            |                                                |                                                                                                                                                                                                                         |
|------------|------------------------------------------------|-------------------------------------------------------------------------------------------------------------------------------------------------------------------------------------------------------------------------|
|            |                                                | <ul style="list-style-type: none"> <li>2. Ambulance - other</li> <li>3. Police patrol vehicle</li> <li>4. Private car</li> <li>5. Taxi</li> <li>6. Bodaboda</li> <li>7. Other (Specify)</li> <li>99. Unknown</li> </ul> |
| <b>P16</b> | <b>Length of stay in hospital</b>              | 1. _____ [in days]    999. Unknown                                                                                                                                                                                      |
| <b>P17</b> | <b>Needed emergency operation on admission</b> | <ul style="list-style-type: none"> <li>1. Yes</li> <li>2. No</li> <li>3. Unknown</li> </ul>                                                                                                                             |
| <b>P18</b> | <b>Injury severity</b>                         | <ul style="list-style-type: none"> <li>1. Mild injuries</li> <li>2. Moderate injuries</li> <li>3. Severe injuries</li> </ul>                                                                                            |
| <b>P19</b> | <b>Outcome</b>                                 | <ul style="list-style-type: none"> <li>1. Died</li> <li>2. Discharged</li> <li>3. Undetermined</li> <li>4. Referred to other health facility</li> <li>99. Unknown</li> </ul>                                            |
| <b>P20</b> | <b>If died specify date of death</b>           | <p><u>DD</u>/<u>MM</u>/<u>YYYY</u></p> <p>( 99/99/9999 if Unknown)</p>                                                                                                                                                  |

Table S1 Distribution of individual injuries by additional characteristics

| Characteristic                               | Non-fatal injuries | Fatal injuries  | Total       |
|----------------------------------------------|--------------------|-----------------|-------------|
|                                              | n=51519            | n=7558<br>n (%) | n=59077     |
| <b>Data Source</b>                           |                    |                 |             |
| Police                                       | 15262(29.6)        | 5144(68.1)      | 20406(34.5) |
| Hospital                                     | 36245(70.4)        | 921(12.2)       | 37166(62.9) |
| Mortuary                                     | -                  | 1493(19.7)      | 1505(2.5)   |
| <b>Police region</b>                         |                    |                 |             |
| Aswa                                         | 1614(3.1)          | 184(2.4)        | 1798(3.0)   |
| Busoga East                                  | 4636(9.0)          | 832(11)         | 5468(9.3)   |
| Elgon                                        | 3021(5.9)          | 347(4.6)        | 3368(5.7)   |
| Greater Masaka                               | 3164(6.1)          | 614(8.1)        | 3778(6.4)   |
| Kampala Metropolitan-East                    | 6742(13.1)         | 1677(22.2)      | 8419(14.3)  |
| Kampala Metropolitan-North                   | 1124(2.2)          | 378(5.0)        | 1502(2.5)   |
| Kampala Metropolitan-South                   | 1192(2.3)          | 94(1.2)         | 1286(2.2)   |
| Katonga                                      | 2039(4.0)          | 504(6.7)        | 2543(4.3)   |
| Kigezi                                       | 2338(4.5)          | 373(4.9)        | 2711(4.6)   |
| Mt. Moroto                                   | 6331(12.3)         | 293(3.9)        | 6624(11.2)  |
| North Kyoga                                  | 1399(2.7)          | 361(4.8)        | 1760(3.0)   |
| North West Nile                              | 3068(6.0)          | 238(3.1)        | 3306(5.6)   |
| Rwenzori                                     | 3705(7.2)          | 355(4.7)        | 4060(6.9)   |
| Rwizi                                        | 7028(13.6)         | 752(9.9)        | 7780(13.2)  |
| Savannah                                     | 1239(2.4)          | 287(3.8)        | 1526(2.6)   |
| West Nile                                    | 2879(5.6)          | 271(3.6)        | 3150(5.3)   |
| <b>Road user</b>                             |                    |                 |             |
| Pedal Cyclist                                | 1544(3.0)          | 305(4.0)        | 1849(3.1)   |
| Passenger(vehicle)                           | 3789(7.4)          | 621(8.2)        | 4410(7.5)   |
| Motorcyclist                                 | 8762(17.0)         | 1357(18.0)      | 10119(17.1) |
| Passenger(motorcycle)                        | 5328(10.3)         | 698(9.2)        | 6026(10.2)  |
| Pedestrian                                   | 8388(16.3)         | 2455(32.5)      | 10843(18.4) |
| Driver                                       | 2004(3.9)          | 261(3.5)        | 2265(3.8)   |
| Other                                        | 316(0.6)           | 50(0.7)         | 366(0.6)    |
| Missing                                      | 21389(41.5)        | 1811(24)        | 23200(39.3) |
| <b>Pre-hospital care given</b>               |                    |                 |             |
| Received first aid                           | 1408(2.7)          | 551(7.3)        | 1959(3.3)   |
| Did not receive first aid                    | 6381(12.4)         | 2909(38.5)      | 9290(15.7)  |
| Missing                                      | 43731(84.9)        | 4098(54.2)      | 47829(81.0) |
| <b>Transport used to the health facility</b> |                    |                 |             |
| Police ambulance                             | 395(0.8)           | 407(5.4)        | 802(1.4)    |
| Other ambulance                              | 98(0.2)            | 11(0.1)         | 110(0.2)    |



---

|                       |             |            |             |
|-----------------------|-------------|------------|-------------|
| Police patrol vehicle | 1819(3.5)   | 1183(15.7) | 3002(5.1)   |
| Private car           | 1861(3.6)   | 180(2.4)   | 2041(3.5)   |
| Taxi                  | 173(0.3)    | 16(0.2)    | 189(0.3)    |
| Boda-boda             | 1272(2.5)   | 106(1.4)   | 1378(2.3)   |
| Other means           | 137(0.3)    | 26(0.3)    | 163(0.3)    |
| <i>Missing</i>        | 45765(88.8) | 5629(74.5) | 51394(87.0) |

---

Table S2 Individual-level fatal crash data by data source (unweighted)

|              | <b>Police</b> | <b>Health facility</b> | <b>Mortuary</b> | <b>Total</b> |
|--------------|---------------|------------------------|-----------------|--------------|
| <b>Total</b> | 1069          | 335                    | 598             | 2002         |

**Additional details S1 (on data systems)**

The Ministry of Health's Health Management Information System (HMIS) is an integrated reporting system that collects information on a routine basis to monitor the Health Sector. It provides data collection tools for capturing patient level data, which is aggregated into summary reports for submission to the next level. The flow of HMIS information is from the lowest level, which is the community, to the health unit, health sub-district, district and finally to the National Health Databank /Resource Centre of the Ministry of Health.

Patient-specific data are collected from various points during the patient's health facility visit, and at each point, a different data source contains the relevant information. These include the Out-Patient Department (OPD) register, In-patient register, case notes (also called the patient's in-hospital file), and discharge register. Different numbers may be assigned at various points, and in particular, the out-patient and in-patient numbers differ. Data are initially captured on paper, and digitization begins when summaries are made from the paper registers. HMIS data are aggregated at the health facility.

In 2016, the only variables recorded for injuries were the patient's sex, age (whether before 5 years, or 5 and above), and whether the injury was due to a road traffic crash, gender-based violence, or some other cause. In order to collect the information necessary for this study therefore, registers were used to find the patients' inpatient numbers, and their case files were retrieved where possible. For patients that were never admitted, or those whose case files could not be retrieved, only the information available in the OPD register was used. Where road traffic was not mentioned specifically, even if the rest of the information on the case file suggested the cause to be the road, these cases were not included. There were no forms at health facilities requiring the external cause of an injury (e.g. road traffic or fall) to be recorded. The amount and type of information recorded about the injuries therefore varied depending on what the health worker seeing the patient thought was important.

### **Additional details S2 (on weighting approach)**

Since a multi-stage cluster sampling approach was used to select the study sites, we accounted for this design in the analysis by weighting the data. The selection of the police regions and police stations formed the basis for assigning the weights. As described in the sampling section, 16 out of the 27 police regions in the country were selected in the first sampling stage, and then 2 police stations and 2 health facilities were selected from within each sampled police region in the second sampling stage, after which all available records on traffic crashes at the selected police stations, health facilities, and mortuaries were abstracted. The weights assigned in the crash-level analysis were calculated as the inverse of the product of the probabilities of selecting the police region, and the probability of selecting a police station within the police region. (Reference: [https://www.who.int/tb/advisory\\_bodies/impact\\_measurement\\_taskforce/meetings/prevalence\\_survey/psws\\_probability\\_prop\\_size\\_bierrenbach.pdf](https://www.who.int/tb/advisory_bodies/impact_measurement_taskforce/meetings/prevalence_survey/psws_probability_prop_size_bierrenbach.pdf) )

We applied the same weights to the individual-level data as described in the crash-level data section. This is because all the available records of individual injuries at a given police station, health facility or mortuary were extracted, implying that the probability of extraction was essentially one (100%). Health facilities and mortuaries were assigned weights based on the selection probability of the police region within which they are located and the nearest police station in the sample.
